# Supplementary material for: Deciphering mechanisms of acquired T790M mutation after EGFR inhibitors for NSCLC by computational simulations
Source: PubMed Central journal article supplement (PMC5529360; doi:10.1038/s41598-017-06632-y), 2017-07-26
Supplement: 41598_2017_6632_MOESM1_ESM.pdf [file 41598_2017_6632_MOESM1_ESM.pdf]

## **SUPPLEMENTARY INFORMATION**

### **Deciphering mechanisms of acquired T790M mutation after EGFR inhibitors for NSCLC by computational simulations**

Bin Zou, Victor H. F. Lee, Lijiang Chen, Lichun Ma, Debby D. Wang and Hong Yan

## SUPPLEMENTARY FIGURES:

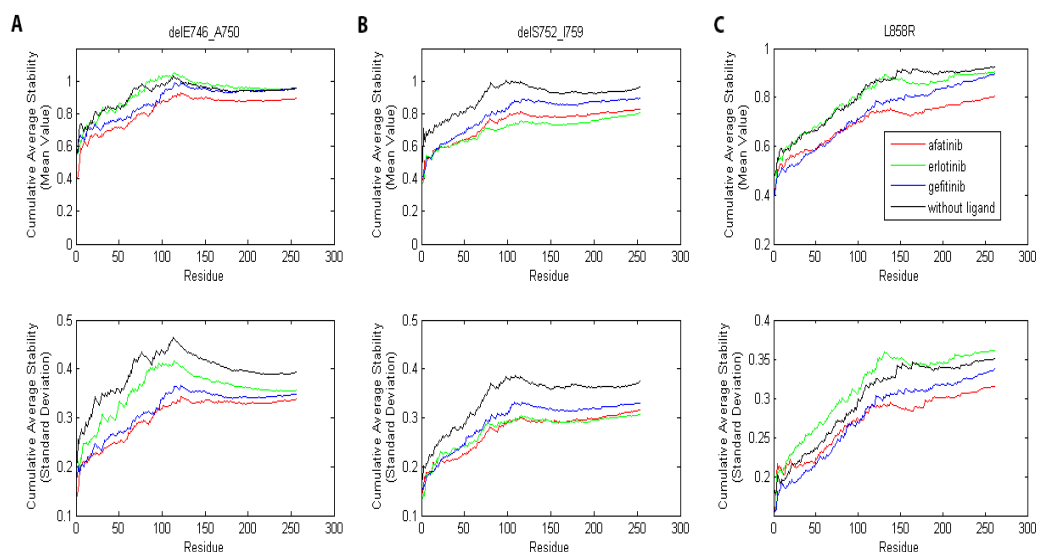

**Supplementary Fig. S1.** Comparison of the cumulative average stability between EGFR mutant-TKI complexes and EGFR mutants without ligand. The cumulative average stability for residue index  $k$  corresponded to the average stability of the first  $k$  residues closest to the residue T790. It was shown that, EGFR mutants without ligand (black) had a lower stability (larger values in the figures) than EGFR mutant-TKI complexes in most cases. This implied that combination with a ligand could increase the stability of the EGFR mutant. One exception was that the stability (standard deviation) of the L858R-erlotinib complex was lower than that of L858R. The reason might be that the stability of L858R was very high relative to delE746\_A750 and delS752\_I759 (Figure 4) and in this case the effect of the ligand (erlotinib) might not always work for L858R. It was also observed that EGFR mutant-afatinib complexes (red) demonstrated the highest stability in most cases. This is because that afatinib covalently binds to EGFR mutants, which could make EGFR mutant-TKI complexes more stable.

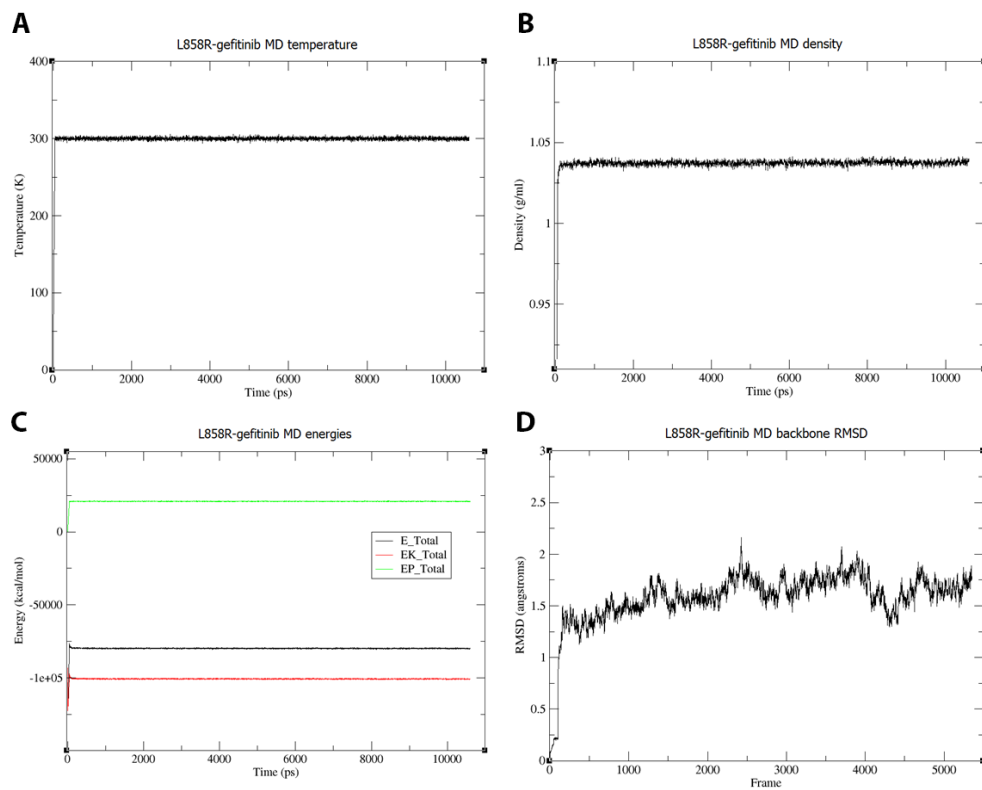

**Supplementary Fig. S2.** The (A) temperature, (B) density, (C) energy and (D) backbone RMSD of the L858R-gefitinib complex as functions of time. It was observed that the system finally achieved a stable state after a series of equilibration operations.
